# Supplementary material
Source: publisher site journal article supplement (https://www.degruyterbrill.com/publication/isbn/9783110442434/downloadAsset/9783110442434_Begleitmaterial_Biosignalverarbeitung.zip)
Supplement: Supplementary file 2 [file 9783110442434_Begleitmaterial_Biosignalverarbeitung.zip]

## Begleitmaterial zum Buch Biosignalverarbeitung mit Matlab

Autoren: Bernhard, Brensing, Witte

| Bezug       | Thema                                                                                                                                                                                                                                                                                                                                                                                                                                                                                                                                                                                                                                                                                                                                                                                                                                                                                                                                                                                                                                        | Dateien                                                                                             |
|-------------|----------------------------------------------------------------------------------------------------------------------------------------------------------------------------------------------------------------------------------------------------------------------------------------------------------------------------------------------------------------------------------------------------------------------------------------------------------------------------------------------------------------------------------------------------------------------------------------------------------------------------------------------------------------------------------------------------------------------------------------------------------------------------------------------------------------------------------------------------------------------------------------------------------------------------------------------------------------------------------------------------------------------------------------------|-----------------------------------------------------------------------------------------------------|
| Listing 2.1 | Zeigt die Grundfunktionen zur Erzeugung und grafischen Darstellung von Modulationssignalen.                                                                                                                                                                                                                                                                                                                                                                                                                                                                                                                                                                                                                                                                                                                                                                                                                                                                                                                                                  | Listing_2_1.m                                                                                       |
| Listing 2.2 | Zeigt die Grundfunktionen der grafischen Darstellung in der Anwendung der Fourier-Reihe.                                                                                                                                                                                                                                                                                                                                                                                                                                                                                                                                                                                                                                                                                                                                                                                                                                                                                                                                                     | Listing_2_2.m                                                                                       |
| Abb. 3.17   | <p><u>CellMell-Simulation von Aktionspotentialen bei Anregung</u></p> <p>Aktionspotential nach einer äußeren Anregung einer Muskelzelle in der Herzkammer nach dem Model von Beeler und Reuter (oben) [1], nach dem Model von Yanagihara für den Sinusknoten (SA) (mittig) [59] und nach dem Model von Noble für die Purkinje-Fasern (unten) [37].</p> <p>Die Modelle sind in der Sprache CellML geschrieben, sind frei verfügbar, wurden von der Webseite "<a href="http://models.cellml.org">http://models.cellml.org</a>" geladen und mit dem open source Programm openCOR simuliert, was auf der Webseite "<a href="http://www.opencor.ws">http://www.opencor.ws</a>" ebenfalls kostenlos zur Verfügung gestellt wird.</p> <p>Hierbei können verschiedene Modellparameter, wie z.B. die Konzentrationen der Natrium- und Kaliumionen variiert und deren Auswirkung auf das Aktionspotential untersucht werden. Zur grafischen Darstellung wurden die Ergebnisse in eine Excel-Datei exportiert und zum Plotten in Matlab eingelesen.</p> | <p>Abb_3_17_beeler_reuter.cellml</p> <p>Abb_3_17_noble.cellml</p> <p>Abb_3_17_yanagihara.cellml</p> |

|                    |                                                                                                                                                                                                                                                                                                                                                                                                                                                                                                                                                                                                                                                                                                                                                                                                                                                                                                                                                                                                                                                                                                                                                                                                                                                                                |                                                                                                                                                          |
|--------------------|--------------------------------------------------------------------------------------------------------------------------------------------------------------------------------------------------------------------------------------------------------------------------------------------------------------------------------------------------------------------------------------------------------------------------------------------------------------------------------------------------------------------------------------------------------------------------------------------------------------------------------------------------------------------------------------------------------------------------------------------------------------------------------------------------------------------------------------------------------------------------------------------------------------------------------------------------------------------------------------------------------------------------------------------------------------------------------------------------------------------------------------------------------------------------------------------------------------------------------------------------------------------------------|----------------------------------------------------------------------------------------------------------------------------------------------------------|
| Abb. 3.23 bis 3.27 | <p data-bbox="352 199 951 264"><u>Scilab/Xcos-Simulation der Aktionspotentiale selbstschwingender Nervenzellen</u></p> <p data-bbox="352 295 1054 584">Es wird ein modifizierter Van-der-Pol-Oszillator nach Grudzinski und Zebrowski [15] gemäß Gleichung 3.44 zur Beschreibung des Aktionspotentials einer schwingungserzeugenden Nervenzelle oder eines ganzen Bündels gleichartiger Nervenzellen wie die des Sinus (SA)- oder Atrioventrikular (AV)-Knotens verwendet, um das Verhalten dieser Knoten bei verschiedenen äußeren Störungen durch kurzzeitige Impulse zu untersuchen.</p> <p data-bbox="352 616 922 680">Abb. 3.23 und 3.24 zeigen den ungestörten Oszillator.</p> <p data-bbox="352 712 1059 871">Abb. 3.25 und 3.26 zeigen den gestörten Oszillator und das Ausgangssignal, wenn ein Rechteckimpuls bei Zeiteinheit 35 mit einer Amplitude von 4 und einer Breite von 2 Zeiteinheiten angelegt wird. Dabei kommt es zu Aussetzern über zwei Schwingungen.</p> <p data-bbox="352 902 895 999">Abb. 3.27 zeigt das völlige Aussetzen der Schwingungen, wenn die Höhe dieses Rechteckimpulses verdoppelt wird.</p> <p data-bbox="352 1030 1043 1095">Die Scilab/Xcos-Modelle wurden schon in [6] von W. Engelmann und K.-H. Witte zur Verfügung gestellt.</p> | <p data-bbox="1082 199 1281 230">Abb_3_23.zcos</p> <p data-bbox="1082 262 1281 293">Abb_3_25.zcos</p> <p data-bbox="1082 324 1281 356">Abb_3_27.zcos</p> |
|--------------------|--------------------------------------------------------------------------------------------------------------------------------------------------------------------------------------------------------------------------------------------------------------------------------------------------------------------------------------------------------------------------------------------------------------------------------------------------------------------------------------------------------------------------------------------------------------------------------------------------------------------------------------------------------------------------------------------------------------------------------------------------------------------------------------------------------------------------------------------------------------------------------------------------------------------------------------------------------------------------------------------------------------------------------------------------------------------------------------------------------------------------------------------------------------------------------------------------------------------------------------------------------------------------------|----------------------------------------------------------------------------------------------------------------------------------------------------------|

|                           |                                                                                                                                                                                                                                                                                                                                                                                                                                                                                                                                                                                                                                                                                                                                                                                                                                                                                                                                                                                                                                                                                                                                                                                                                                                                                                                                                                                                                                                                                                                                                                                                       |                                                                                     |
|---------------------------|-------------------------------------------------------------------------------------------------------------------------------------------------------------------------------------------------------------------------------------------------------------------------------------------------------------------------------------------------------------------------------------------------------------------------------------------------------------------------------------------------------------------------------------------------------------------------------------------------------------------------------------------------------------------------------------------------------------------------------------------------------------------------------------------------------------------------------------------------------------------------------------------------------------------------------------------------------------------------------------------------------------------------------------------------------------------------------------------------------------------------------------------------------------------------------------------------------------------------------------------------------------------------------------------------------------------------------------------------------------------------------------------------------------------------------------------------------------------------------------------------------------------------------------------------------------------------------------------------------|-------------------------------------------------------------------------------------|
| <p>Abb. 3.28 bis 3.33</p> | <p><u>Scilab/Xcos-Simulation der Aktionspotentiale des gekoppelten Sinus (SA)- und Atrioventrikular (AV)-Knotens</u></p> <p>Oszillatormodell mit SA- und AV-Knoten des Herzens gemäß Gleichung 3.45 analog [60]. Bei diesem Modell beeinflusst der SA-Knoten den AV-Knoten und es wird untersucht wie sich die Änderungen von verschiedenen Modellparametern auf den Ausgang des SA- und AV-Knotens auswirken. Abb. 3.30 zeigt das Ergebnis, wenn der SA-Knoten den AV-Knoten nicht beeinflusst (Parameterwerte: <math>k_{SA-AV} = 12</math>, <math>k_{AV-AV} = 1</math>, <math>e_{SA} = 12</math> und <math>e_{AV} = 11</math>).</p> <p>Abb. 3.31 zeigt den synchronisierten Fall, wenn der SA-Knoten den AV-Knoten so beeinflusst, dass die Schwingungsfrequenzen gleich sind (Parameterwerte <math>k_{SA-AV} = 12</math>, <math>k_{AV-AV} = 1</math>, <math>e_{SA} = 12</math> und <math>e_{AV} = 11</math>).</p> <p>Abb. 3.32 zeigt das Ergebnis, wenn die Kopplung so stark ist, daß am AV-Knoten Aussetzer entstehen (Parameterwerte: <math>k_{SA-AV} = 12</math>, <math>k_{AV-AV} = 1</math>, <math>e_{SA} = 12</math> und <math>e_{AV} = 9</math>).</p> <p>Abb. 3.33 zeigt das Ergebnis, wenn die Kopplung zu stark und der Parameter <math>e_{AV}</math> des AV-Knotens so ungünstig ist, dass die Schwingung des AV-Knotens total aussetzt (Parameterwerte: <math>k_{SA-AV} = 12</math>, <math>k_{AV-AV} = 1</math>, <math>e_{SA} = 12</math> und <math>e_{AV} = 7</math>).</p> <p>Die Scilab/Xcos-Modelle wurden schon in [6] von W. Engelmann und K.-H. Witte zur Verfügung gestellt.</p> | <p>Abb_3_30.zcos</p> <p>Abb_3_31.zcos</p> <p>Abb_3_32.zcos</p> <p>Abb_3_33.zcos</p> |
| <p>Abb. 3.34 bis 3.36</p> | <p><u>Scilab/Xcos-Simulation der Aktionspotentiale und eines EKGs durch Kopplung des Sinus (SA)-, Atrioventrikular (AV)-Knotens und des His-Purkinje-Komplexes (HP)</u></p> <p>Oszillatormodell mit SA-, AV-Knoten des HP-Komplexes des Herzens gemäß Gleichung 3.47 nach [12].</p> <p>Bei diesem erweiterten Modell beeinflusst der SA-Knoten den AV-Knoten und dieser den HP-Komplex. Mit den gewichteten Signalen dieser drei Oszillatoren lässt sich ein Gesamtsignal erzeugen, das einem an der Körperoberfläche gemessenen EKG eines gesunden Tieres oder Menschen sehr ähnlich ist. Bei Änderung der Oszillator-Parameter (z.B. <math>e_{AV}</math>) oder der Kopplungsstärken zwischen den Oszillatoren (z.B. <math>k_{AV-SA}</math>) lassen sich aber auch pathologische EKGs erzeugen.</p> <p>Die Scilab/Xcos-Modelle wurden schon in [6] von W. Engelmann und K.-H. Witte zur Verfügung gestellt.</p>                                                                                                                                                                                                                                                                                                                                                                                                                                                                                                                                                                                                                                                                                      | <p>Abb_3_34.zcos</p>                                                                |

|           |                                                                                                                                                                                                                                                                                                                                                                                                                                                                                                                                                                                                                                                                                                                                                                                                                                                                                                                                                                                                                                                                                                                                                                                                                                                          |                                                           |
|-----------|----------------------------------------------------------------------------------------------------------------------------------------------------------------------------------------------------------------------------------------------------------------------------------------------------------------------------------------------------------------------------------------------------------------------------------------------------------------------------------------------------------------------------------------------------------------------------------------------------------------------------------------------------------------------------------------------------------------------------------------------------------------------------------------------------------------------------------------------------------------------------------------------------------------------------------------------------------------------------------------------------------------------------------------------------------------------------------------------------------------------------------------------------------------------------------------------------------------------------------------------------------|-----------------------------------------------------------|
| Abb. 4.8  | <p><u>LTspice-Simulation des Instrumentenverstärkers</u></p> <p>Es soll die berechnete Verstärkung und die Wirkung der Gleichtaktunterdrückung überprüft werden.</p> <p>Versuch 1: Am Schaltungseingang <math>U_{\text{EKG}}</math> wird eine Wechselspannung (AC Amplitude 1mV) angelegt und im Modus <i>AC Analysis</i> die Ausgangsspannung im Frequenzbereich 1Hz - 100Hz simuliert (<math>U_{\text{GI}}=0</math>). Aus dem Verhältnis der Ausgangsspannung zur Eingangsspannung wird die Gegentaktverstärkung berechnet.</p> <p>Versuch 2: Es wird nur die Gleichtaktstörung an den Eingang gelegt (<math>U_{\text{GI}}=1\text{V}</math> mit 50Hz, <math>U_{\text{EKG}}=0</math>) und im Modus <i>Transient (Stop time 0.1s)</i> simuliert. Es werden die Spannungen oberhalb der Quelle und am Schaltungsausgang miteinander verglichen.</p> <p>Versuch 3: Am Schaltungseingang <math>U_{\text{EKG}}</math> wird ein EKG-Signal angelegt (Datei: <i>EKG_milli</i>), das von einer Gleichtaktstörung (<math>U_{\text{GI}}=1\text{V}</math> mit 50Hz) überlagert ist, und im Modus <i>Transient (Stop time 1s)</i> simuliert. Es werden die Spannungen oberhalb von <math>U_{\text{EKG}}</math> und am Schaltungsausgang miteinander verglichen.</p> | <p>Abb_4_8_Instrumentenverstaerker.asc</p> <p>EKG.txt</p> |
| Abb. 4.10 | <p><u>LTspice-Simulation des Messverstärkers</u></p> <p>Es soll die berechnete Gesamtverstärkung und die Filterwirkung überprüft werden.</p> <p>Versuch: Die Schaltung wird im Modus <i>AC Analysis</i> im Bereich 0.01 Hz - 10 kHz simuliert und der Betragsfrequenzgang vor C1, nach C1 und am Schaltungsausgang abgegriffen. Aus dem Verhältnis der Ausgangsspannung zur Eingangsspannung wird die Gegentaktverstärkung berechnet.</p> <p>Die jeweiligen Grenzfrequenzen von Hochpassfilter und den beiden Tiefpassfiltern können durch Variation von C1 bzw. von C2 und C3/C4 verändert werden.</p>                                                                                                                                                                                                                                                                                                                                                                                                                                                                                                                                                                                                                                                  | <p>Abb_4_8_Messverstaerker.asc</p>                        |
| Abb. 4.15 | <p><u>LTspice-Simulation der Bezugspotentialsteuerung</u></p> <p>Es soll das Signal am Ausgang der Bezugspotentialsteuerung bzgl. Amplitude und Phase mit der Gleichtaktstörung verglichen werden.</p> <p>Versuch: Es wird nur die Gleichtaktstörung an den Eingang gelegt (<math>U_{\text{GI}}=0.1\text{V}</math>, 50Hz) und im Modus <i>Transient (Stop time 0.1s)</i> simuliert. Es werden die Spannungen oberhalb der Quelle und am Ausgang der Bezugspotentialsteuerung miteinander verglichen und hinsichtlich der berechneten Verstärkung 22 und Phasendrehung <math>180^\circ</math> überprüft.</p>                                                                                                                                                                                                                                                                                                                                                                                                                                                                                                                                                                                                                                              | <p>Abb_4_15_Bezugspotentialsteuerung.asc</p>              |

|                                    |                                                                                                                                                                                                                                                                                                                                                                                                                                                                                                                                                                                                                                                                                                    |                                                            |
|------------------------------------|----------------------------------------------------------------------------------------------------------------------------------------------------------------------------------------------------------------------------------------------------------------------------------------------------------------------------------------------------------------------------------------------------------------------------------------------------------------------------------------------------------------------------------------------------------------------------------------------------------------------------------------------------------------------------------------------------|------------------------------------------------------------|
| Abb. 4.17                          | <p><u>LTspice-Simulation der galvanisch eingekoppelten Gleichtaktstörung</u></p> <p>Es soll die Abhängigkeit der Gleichtaktstörung von der Größe des Isolationswiderstands <math>R_{is}</math> untersucht werden.</p> <p>Versuch: Am Schaltungseingang <math>U_{EKG}</math> wird ein EKG-Signal angelegt (Datei: <i>EKG_milli</i>). Für die Netzstörung wird <math>U_{netzstörung}=230V</math>, 50Hz eingestellt. Die Simulation erfolgt im Modus <i>Transient (Stop time 1s)</i>. Es wird die Abhängigkeit der Gleichtaktstörung am Schaltungsausgang vom Isolationswiderstand <math>R_{is}</math> untersucht, in dem <math>R_{is}</math> in 10er-Potenzschritten erhöht und verringert wird.</p> | <p>Abb_4_17_Netzstoerung_galvanisch.asc</p> <p>EKG.txt</p> |
| Abb. 4.25<br>Abb. 4.26             | <p><u>LTspice-Simulation eines aktiven Tiefpassfilters 1. Ordnung</u></p> <p>Es soll der Betrags- und Phasenfrequenzgang überprüft werden.</p> <p>Versuch: Die Schaltung wird im Modus <i>AC Analysis</i> im Bereich 0.01 Hz - 10 kHz simuliert und der Betragsfrequenzgang am Schaltungsausgang abgegriffen. Aus dem Verhältnis der Ausgangsspannung zur Eingangsspannung wird die Verstärkung berechnet. Die Grenzfrequenz wird durch Variation von C1 oder R1 verändert. Durch Tausch von C1 mit R1 wird ein Hochpassfilter erzeugt.</p>                                                                                                                                                        | Abb_4_25_TP_aktiv_1.asc                                    |
| Abb. 4.27<br>Abb. 4.28<br>Tab. 4.4 | <p><u>LTspice-Simulation eines Sallen-Key-Filters 4. Ordnung</u></p> <p>Es soll der Betrags- und Phasenfrequenzgang für die verschiedenen a-Werte aus Tab. 4.4 überprüft werden.</p> <p>Die Schaltung wird im Modus <i>AC Analysis</i> im Bereich 0.01 Hz - 2 kHz simuliert und der Betragsfrequenzgang am Schaltungsausgang abgegriffen. Die Grenzfrequenz wird durch Variation von C1 / C2 oder R1 / R2 verändert. Durch Tausch von C1 / C2 mit R1 / R2 wird ein Hochpassfilter erzeugt.</p>                                                                                                                                                                                                     | Abb_4_27_TP_aktiv_4.asc                                    |
| Abb. 4.29<br>Abb. 4.30             | <p><u>LTspice-Simulation eines Notch-Filters</u></p> <p>Es soll der Betrags- und Phasenfrequenzgang überprüft werden.</p> <p>Die Schaltung wird im Modus <i>AC Analysis</i> im Bereich 0.4 Hz - 400 Hz simuliert und der Betragsfrequenzgang am Schaltungsausgang abgegriffen. Die Kerbfrequenz wird durch Variation von C1 / C2 verändert.</p>                                                                                                                                                                                                                                                                                                                                                    | Abb_4_29_Notch_aktiv.asc                                   |

|                       |                                                                                                                                                                                                                                                                                                                                                                                                                                                                                                                                                                                                                        |                                                                                                  |
|-----------------------|------------------------------------------------------------------------------------------------------------------------------------------------------------------------------------------------------------------------------------------------------------------------------------------------------------------------------------------------------------------------------------------------------------------------------------------------------------------------------------------------------------------------------------------------------------------------------------------------------------------------|--------------------------------------------------------------------------------------------------|
| Listing 4.1           | Zeigt die Grundfunktionen zur Erzeugung von digitalen Filtern.                                                                                                                                                                                                                                                                                                                                                                                                                                                                                                                                                         | Listing_4_1.m                                                                                    |
| Abb. 4.40             | LTSpice-Modell eines passiven RC-Potenz-Tiefpasses 1. Grades bei einer Grenzfrequenz von 200 Hz mit zugehörigem Frequenzgang.                                                                                                                                                                                                                                                                                                                                                                                                                                                                                          | Abb_4_40.asc                                                                                     |
| Abb. 4.41, 4.42, 5.19 | <p>LTSpice-Modell einer RLC-Bandsperre 2. Grades bei einer Mittenfrequenz von 50 Hz mit zugehörigem Frequenzgang</p> <p>In Abb. 4.42 und 5.19 werden die Ein- und Ausgangssignale und das Betragsfrequenz-Spektrum dargestellt, wenn mit diesem Filter ein 50Hz-Netzbrumm mit einer Amplitude von 300 <math>\mu</math>V unterdrückt werden soll.</p>                                                                                                                                                                                                                                                                   | <p>Abb_4_41.asc</p> <p>EKG-Muster-Milli_LTSPICE.txt</p>                                          |
| Abb. 4.44             | LTSpice-Modell eines passiven RLC-Tschebyscheff-Tiefpasses 2. Grades bei einer Grenzfrequenz von 200 Hz mit zugehörigem Frequenzgang.                                                                                                                                                                                                                                                                                                                                                                                                                                                                                  | Abb_4_44.asc                                                                                     |
| Abb. 4.45             | <p>LTSpice-Modell eines aktiven RC-Tschebyscheff-Tiefpasses 2. Grades nach der Struktur von "Sallen Key" bei einer Grenzfrequenz von 200 Hz mit zugehörigem Frequenzgang.</p> <p>Wie man erkennt ist der Frequenzgang mit dem des passiven Tschebyscheff-Tiefpasses aus Abb. 4.45 identisch, jedoch kann der aktive Tiefpass prinzipiell auch noch zusätzlich verstärken.</p>                                                                                                                                                                                                                                          | Abb_4_45.asc                                                                                     |
| Abb. 4.88             | LTSpice-Modell eines passiven RLC-Bessel-Tiefpasses 2. Grades bei einer Grenzfrequenz von 200 Hz mit zugehörigem Frequenzgang.                                                                                                                                                                                                                                                                                                                                                                                                                                                                                         | Abb_4_48.asc                                                                                     |
| Listing 5.1           | Zeigt die kohärente Mittelwertbildung eines Zeitsignals mit additivem Rauschen.                                                                                                                                                                                                                                                                                                                                                                                                                                                                                                                                        | Listing_5_1.m                                                                                    |
| Abb. 5.21 bis 5.23    | <p><u>Matlab-Beispiel zu einer digitalen Hochpass-Filterung</u></p> <p>Bei einem Sinus-Signal mit einer Frequenz von 4 kHz, einer Amplitude von 2 V und einem Gleichanteil von 10 V wird der Gleichanteil unterdrückt. Dies geschieht sowohl durch direkte Filterung im Frequenzbereich oder zyklische Faltung.</p>                                                                                                                                                                                                                                                                                                    | <p>Abb_5_21.m</p> <p>Abb_5_22.m</p> <p>Abb_5_23.m</p>                                            |
| Abb. 5.26             | <p><u>Matlab- Beispiel zu einer Kurzzeit-Fouriertransformation</u></p> <p>Das Spektrogramm (Leistungsdichtespektrums in Abhängigkeit vom Fensterbereich) eines Signals mit vier Sinusschwingungen mit 1, 4, 6 und 8 Hz in einem Intervall von 20 s und einem gleitenden weiten Gaussfenster mit einer Breite von 4 s wird erzeugt mit einer zusätzlicher Signaldarstellung sowohl im Zeit- als auch im Frequenzbereich.</p> <p>Hierbei ist die Auflösung der Signals im Frequenzbereich gut aber im Zeitbereich schlecht. Über ein interaktives Dialogfenster kann über "Buttons" die Darstellung variiert werden.</p> | <p>Abb_5_26.m</p> <p>SinusSpruenge4-Tstsig-times.csv</p> <p>SinusSpruenge4-Tstsig-values.csv</p> |

|                    |                                                                                                                                                                                                                                                                                                                                                                                                                                                                                                                                                            |                                                                                                        |
|--------------------|------------------------------------------------------------------------------------------------------------------------------------------------------------------------------------------------------------------------------------------------------------------------------------------------------------------------------------------------------------------------------------------------------------------------------------------------------------------------------------------------------------------------------------------------------------|--------------------------------------------------------------------------------------------------------|
| Abb. 5.27          | <p><u>Matlab- Beispiel zu einer Kurzzeit-Fouriertransformation</u></p> <p>Wie in Abb. 5.26 aber mit einem gleitenden schmalen Gaussfenster mit nur einer Breite von 0.5 s. Auch hier wird eine mit zusätzliche Signaldarstellung im Zeit- und Frequenzbereich erzeugt.</p> <p>Hierbei ist die Auflösung der Signals im Frequenzbereich schlecht aber im Zeitbereich gut. Dies kann man daraus erkennen, dass bei dem Signal mit 1 Hz sogar die Extremwerte des Sinussignals im Leistungsdichtespektrum erkennbar sind.</p>                                 | <p>Abb_5_27.m</p> <p>SinusSpruenge4-Tstsig-times_V2.csv</p> <p>SinusSpruenge4-Tstsig-values_V2.csv</p> |
| Abb. 5.30          | <p><u>Scilab-Beispiel zur Digitalen Wavelet-Transformation</u></p> <p>Digitale Wavelet-Transformation und -Rekonstruktion eines EKG-Signals bis zur 3. Stufe. Die Berechnung kann sowohl in Matlab als auch in Scilab mit Hilfe der Funktionen wavedec() und waverec() erfolgen. In diesem Beispiel wurde das Wavelet sym4 verwendet, welches schon eine gewisse Ähnlichkeit bezüglich des QRS-Komplexes eines EKGs aufweist (Abb. 5.29).</p>                                                                                                              | <p>Abb_5_30.sce</p> <p>EKG-5Period.csv</p>                                                             |
| Abb. 5.38          | <p><u>Allpaßtransformations-Beispiel</u></p> <p>Scilab-Beispiel zur Änderung der Grenzfrequenz eines Tiefpasses 1. Grades mit Hilfe der Tiefpass-Tiefpass-Allpasstransformation nach Gleichung 5.85.</p> <p>Hierbei wird die Betragsübertragungsfunktion dargestellt, wobei mit Hilfe des Transformationsparameters <math>a_0</math> die Grenzfrequenz verändert werden kann.</p>                                                                                                                                                                          | <p>Abb_5_38.sce</p>                                                                                    |
| Abb. 5.39 und 5.40 | <p><u>Impulsinvarianzverfahrens-Beispiel</u></p> <p>Hierbei wird der Entwurf einer digitalen Potenz-Tiefpasses 1.Grades mit einer Grenzfrequenz von 200 Hz an einem Beispiel dargestellt. Zunächst wird dieser Tiefpass im zeitkontinuierlichen Bereich entworfen und mit LTSpice wird der Frequenzgang ermittelt (Abb. 5.39). Danach erfolgt mit Hilfe des Impulsinvarianzverfahrens die Übertragung in den zeitdiskreten Bereich und die zugehörige Betragsübertragungsfunktion dieses Tiefpasses wird mit Hilfe von Scilab dargestellt (Abb. 5.40).</p> | <p>Abb_5_39.asc</p> <p>Abb_5_40.sce</p>                                                                |
| Abb. 5.39 und 5.41 | <p><u>Bilineartransformations-Beispiel</u></p> <p>Wie in Abb. 5.40, jedoch wird der digitale Tiefpass mit Hilfe des Verfahrens gemäß der Bilinear-Transformation entworfen und mit Hilfe von Scilab dargestellt.</p>                                                                                                                                                                                                                                                                                                                                       | <p>Abb_5_39.asc</p> <p>Abb_5_41.sce</p>                                                                |
| Abb. 5.42          | <p>Scilab-Code zur Darstellung der Impulsantwort eines idealen Tiefpasses mit einer Grenzfrequenz von 200 Hz und eines Rechteckfensters mit einer Breite von 8 ms.</p>                                                                                                                                                                                                                                                                                                                                                                                     | <p>Abb_5_42.sce</p>                                                                                    |

|                    |                                                                                                                                                                                                                                                                                                                                                                                                                                                                                                                                                                                                                                                                                                                                                                                                                                                                                                                                                                                                                                                                                                                                                                                                                                                                                                                                                                               |              |
|--------------------|-------------------------------------------------------------------------------------------------------------------------------------------------------------------------------------------------------------------------------------------------------------------------------------------------------------------------------------------------------------------------------------------------------------------------------------------------------------------------------------------------------------------------------------------------------------------------------------------------------------------------------------------------------------------------------------------------------------------------------------------------------------------------------------------------------------------------------------------------------------------------------------------------------------------------------------------------------------------------------------------------------------------------------------------------------------------------------------------------------------------------------------------------------------------------------------------------------------------------------------------------------------------------------------------------------------------------------------------------------------------------------|--------------|
| Abb. 5.43          | <p>Scilab-Code zur Darstellung der zeitdiskreten Impulsantwort eines mit 1 kHz abgetasteten idealen Tiefpasses mit einer Grenzfrequenz von 200 Hz in und einem Rechteckfensters mit einer Breite von 8 ms. Dabei erhält man in dem Rechteckfenster 8 Abtastwerte.</p>                                                                                                                                                                                                                                                                                                                                                                                                                                                                                                                                                                                                                                                                                                                                                                                                                                                                                                                                                                                                                                                                                                         | Abb_5_43.sce |
| Abb. 5.44          | <p><u>Direkte digitale Filtersynthese mit Hilfe der Fenstermethode</u></p> <p>Beispiel für den Entwurf eines digitalen Filters mit Hilfe der 8 Abtastwerte der Impulsantwort des idealen Tiefpasses gemäß Gleichung 5.109 und Abb. 5.43.</p> <p>Hierbei wird der zugehörige Betragsfrequenzgang nach Gleichung 5.110 mit Hilfe des Scilab-Codes berechnet und dargestellt. Zum Vergleich wird auch der Betragsfrequenzgang des idealen Tiefpasses gestrichelt eingetragen. Die wellenartigen Abweichungen von der Übertragungsfunktion des idealen Tiefpasses entstehen durch das Abschneiden der Impulsantwort durch das Rechteckfenster.</p>                                                                                                                                                                                                                                                                                                                                                                                                                                                                                                                                                                                                                                                                                                                                | Abb_5_44.sce |
| Abb. 5.45 bis 5.47 | <p><u>Direkte digitale Filtersynthese mit Hilfe der Frequenzabtastung</u></p> <p>Beispiel für den Entwurf eines digitalen Filters mit Hilfe von 15 Abtastwerten für eine Periode des periodischen Betragsfrequenzgangs eines idealen Tiefpasses mit einer Grenzfrequenz von 200 Hz und einer Abtastfrequenz von 1 kHz. Durch inverse Fourier-Transformation wird dann mit dem Scilab-Code die zugehörige Impulsantwort gemäß Gleichung 5.115 bestimmt und in Abb. 5.46 dargestellt.</p> <p>Da allerdings bei dem FIR-Filter die Impulsantwort beschränkt ist, ist der daraus ermittelte Frequenzgang wieder wellenförmig und stimmt nur bei den "Abtastwerten" mit dem Frequenzgang des idealen Tiefpasses überein (siehe Abb. 5.45).</p> <p>Bei Grenzfrequenz von 200Hz ist der "Abtastwert" des idealen Tiefpasses nicht eindeutig und kann zwischen 0 und 1 frei gewählt werden, da hier ein Filterflanke mit unendlicher Steilheit vorliegt. Wird der "Abtastwert" nun nicht zu 1 sondern ein Mittelwert, z.B. 0,4 gewählt, lassen sich die wellenartigen Überschwinger des Frequenzgangs reduzieren (siehe Abb.5.47).</p> <p>Im Scilab-Code ist diese Modifikation als Kommentar eingetragen. Werden die zugehörigen Kommentarzeichen "//" in der 1. und 2. Spalte der 10. Zeile gelöscht, wird diese Änderung nach Speicherung und erneuter Codeausführung wirksam.</p> | Abb_5_45.sce |



|                    |                                                                                                                                                                                                                                                                                                                                                                                                                                                                                                                                                                                                                                                                                                                                                                                                                                                                                                                                                                                                                                                  |                                 |
|--------------------|--------------------------------------------------------------------------------------------------------------------------------------------------------------------------------------------------------------------------------------------------------------------------------------------------------------------------------------------------------------------------------------------------------------------------------------------------------------------------------------------------------------------------------------------------------------------------------------------------------------------------------------------------------------------------------------------------------------------------------------------------------------------------------------------------------------------------------------------------------------------------------------------------------------------------------------------------------------------------------------------------------------------------------------------------|---------------------------------|
| Listing 6.1        | Berechnung des Zeit-Frequenz- und des Leistungsdichtespektrums eines EEG Signals zum des Berger Experiments.                                                                                                                                                                                                                                                                                                                                                                                                                                                                                                                                                                                                                                                                                                                                                                                                                                                                                                                                     | Listing_6_1.m<br>eeg.txt        |
| Listing 6.2        | <u>Matlab-Analyse eines EMG</u><br><br>Matlab-Skript zur Berechnung des Schwerpunkts des EMG-Leistungsdichtespektrums: Das Original wird als wave-Datei eingelesen. Es soll die Auswirkung der Fensterbreite (Blackman-Fenster, Ausgangswert 512) auf das Leistungsdichtespektrum und die Lage des spektralen Schwerpunkts untersucht werden.                                                                                                                                                                                                                                                                                                                                                                                                                                                                                                                                                                                                                                                                                                    | Listing_6_2.m<br>emg.wav        |
| Listing 6.3        | <u>Matlab-Analyse eines Phonokardiogramms</u><br><br>Es sollen die einzelnen Schritte der Signalverarbeitung nachvollzogen werden. Die Fensterbreite des Moving-Average-Filters (windowSize, Ausgangswert 200) kann verändert und die Auswirkung auf das Ergebnis untersucht werden.                                                                                                                                                                                                                                                                                                                                                                                                                                                                                                                                                                                                                                                                                                                                                             | Listing_6_3.m<br>pkg.wav        |
| Abb. 6.16 und 6.22 | <u>Signalverarbeitung beim Pan-Tompkins-Algorithmus</u><br><br>In Abb. 6.6 wird ein Scilab/Xcos-Modell des Pan-Tompkins-Algorithmus zur Erkennung der R-Zacken im EKG dargestellt. Abb. 6.22 zeigt die Signalverarbeitung des EKGs nach verschiedenen Vorfilterungen.<br><br>Das EKG wird nicht aus gemessenen realen EKGs eingelesen sondern analytisch mit einem Scilab-Modell nach dem Simulator von McSharry und Clifford künstlich erzeugt (McSharry PE, Clifford GD, Tarassenko L, Smith L. <a href="#">A dynamical model for generating synthetic electrocardiogram signals</a> . <i>IEEE Transactions on Biomedical Engineering</i> 50(3): 289-294; March 2003).<br><br>Dieser Simulator ist im Physionet frei verfügbar und kann dort von der Seite "https://www.physionet.org/physiotools/ecgsyn/" in Matlab, Octave oder als Java-Applet geladen werden.<br><br>Dadurch ist es möglich den Pan-Tompkins-Algorithmus auch bei verschiedenen Störungen (z.B. Einfluß durch Atmung, Grundlienschwankungen oder Rauschen) zu untersuchen. | Abb_6_16.zcos<br>rrprocess2.sci |
| Abb. 6.17          | Frequenzgangberechnung des Tiefpasses mit Scilab.                                                                                                                                                                                                                                                                                                                                                                                                                                                                                                                                                                                                                                                                                                                                                                                                                                                                                                                                                                                                | Abb_6_17_LP-Filter.sce          |
| Abb. 6.18          | Frequenzgangberechnung des Hochpasses mit Scilab.                                                                                                                                                                                                                                                                                                                                                                                                                                                                                                                                                                                                                                                                                                                                                                                                                                                                                                                                                                                                | Abb_6_18_HP-Filter.sce          |
| Abb. 6.19          | Frequenzgangberechnung des Differenzierers mit Scilab.                                                                                                                                                                                                                                                                                                                                                                                                                                                                                                                                                                                                                                                                                                                                                                                                                                                                                                                                                                                           | Abb_6_19_Diff-Filter.sce        |
| Abb. 6.20          | Frequenzgangberechnung des gleitenden Mittelwertfilters (MA) mit Scilab.                                                                                                                                                                                                                                                                                                                                                                                                                                                                                                                                                                                                                                                                                                                                                                                                                                                                                                                                                                         | Abb_6_20_MA-Filter.sce          |
